# Supplementary material for: Automated Segmentation of Skin Strata in Reflectance Confocal Microscopy Depth Stacks
Source: PubMed Central journal article supplement (PMC4835045; doi:10.1371/journal.pone.0153208), 2016-04-18

## Patch Preprocessing

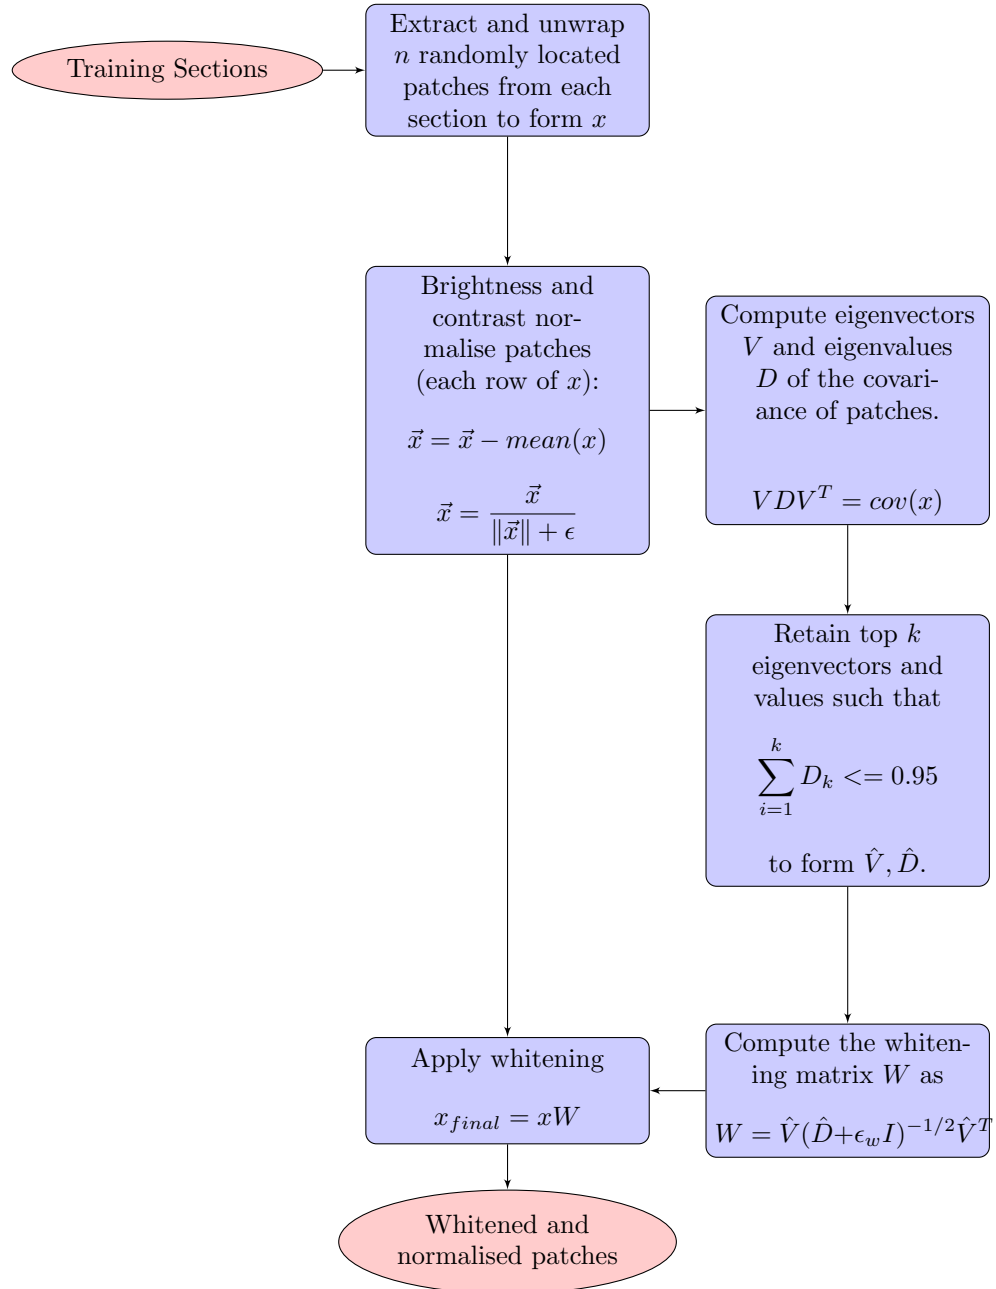

# Hierarchical Spherical K-Means

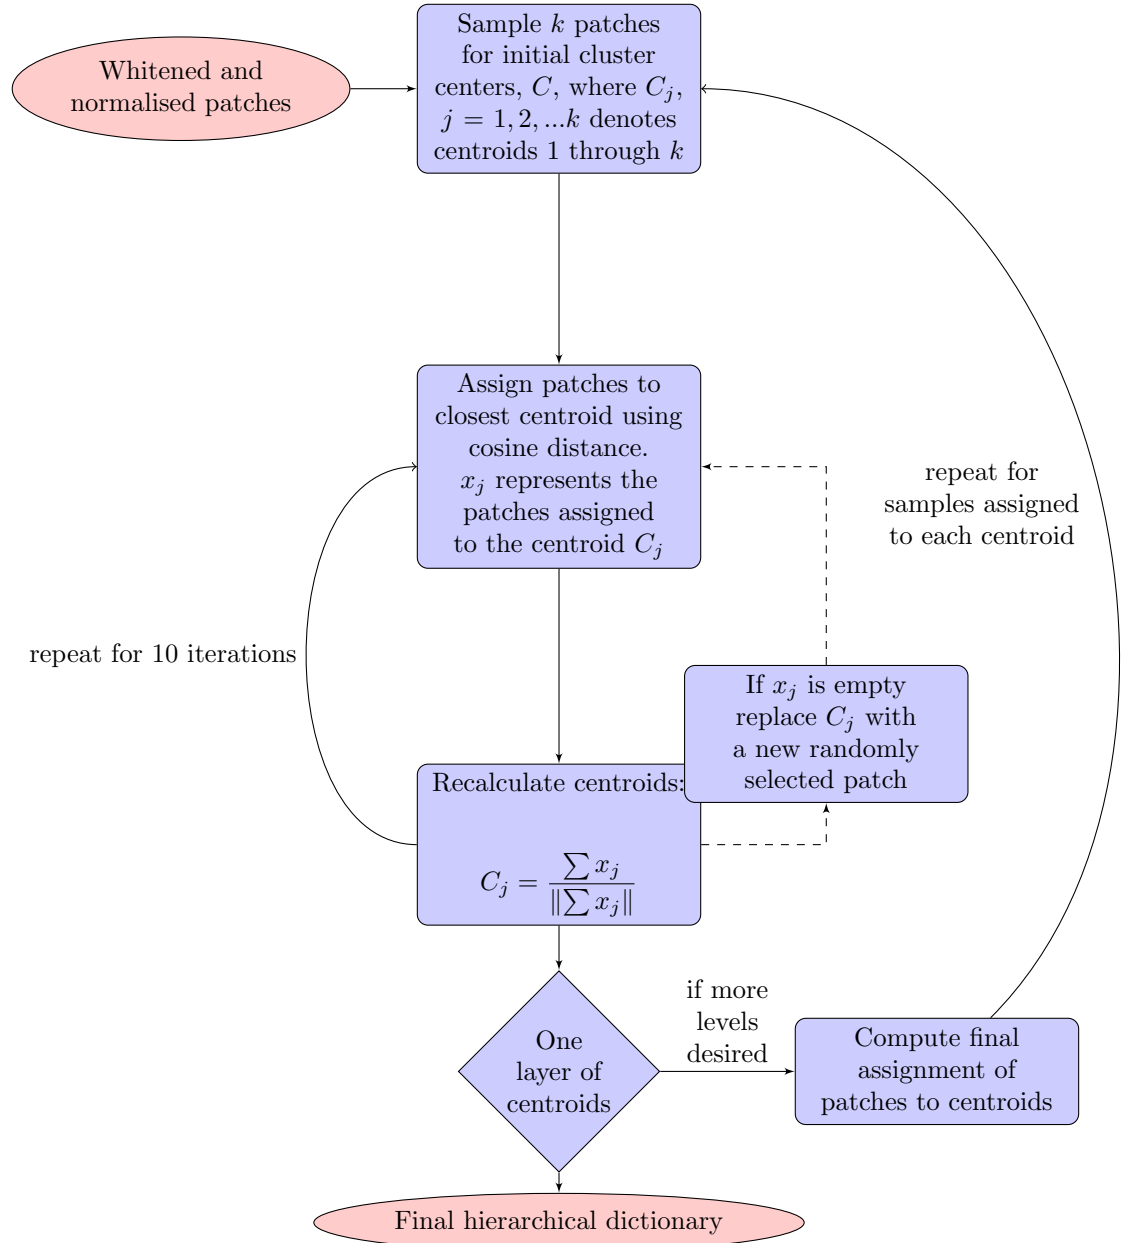

## Augmentation and Section Classification

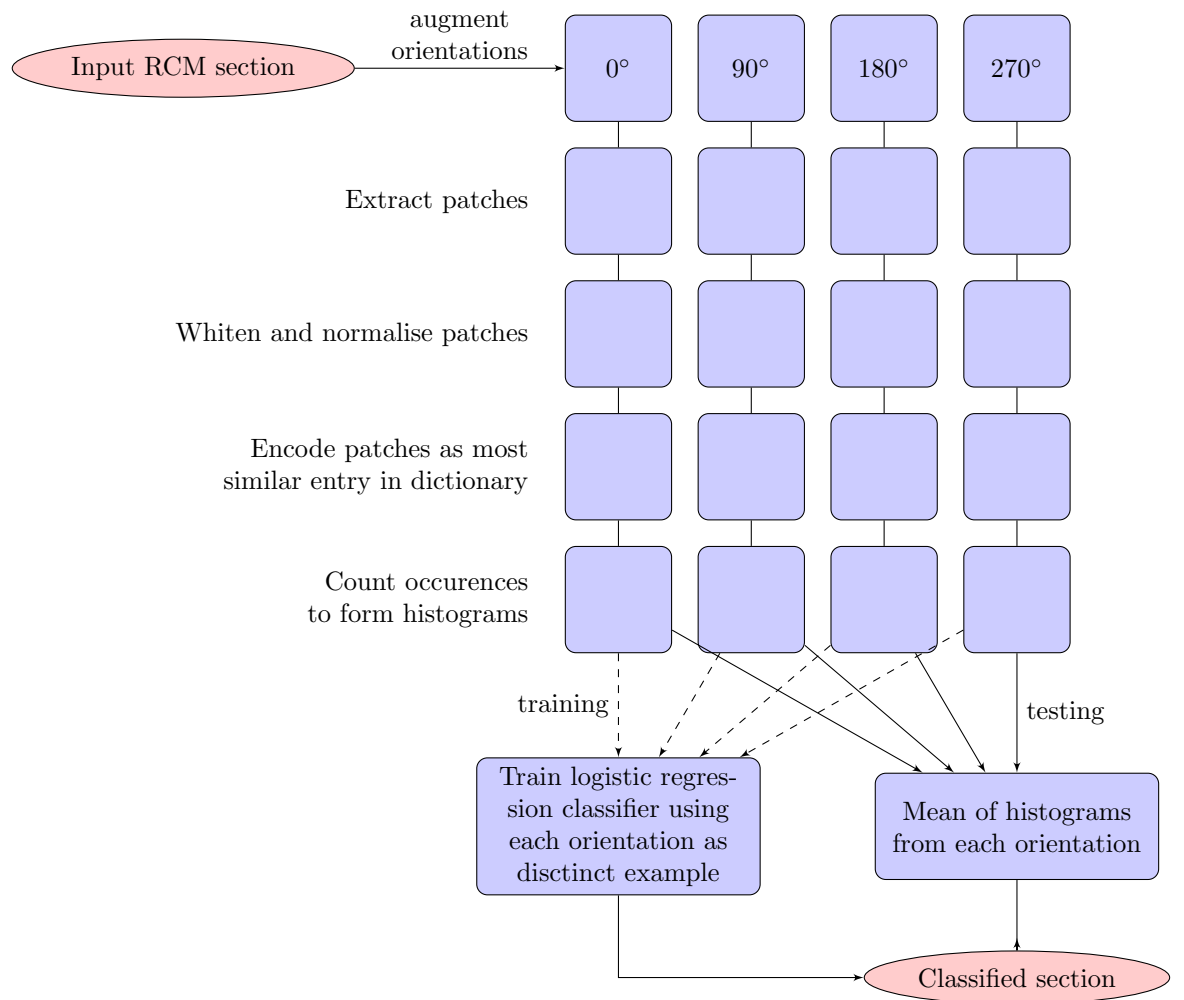

Supplement: pone.0153208.s002.pdf [file pone.0153208.s002.pdf]
